# Supplementary material for: Thermal method usage features for multicomponent crystal screening
Source: Royal Society of Chemistry journal article supplement (doi:10.1039/d1ce01717a), 2022-01-01
Supplement: d1ce01717a1.pdf [file d1ce01717a1.pdf]

Electronic Supplementary Information

for

# Thermal methods usage features for multicomponent crystals screening

*Denis E. Boycov,<sup>a</sup> Alex N. Manin,<sup>a</sup> Ksenia V. Drozd,<sup>a</sup> Andrei V. Churakov,<sup>b</sup> German L.  
Perlovich<sup>a\*</sup>*

<sup>a</sup> G.A. Krestov Institute of Solution Chemistry of the Russian Academy of Sciences, 1  
Akademicheskaya St., 153045, Ivanovo, Russia

<sup>b</sup> N.S. Kurnakov Institute of General and Inorganic Chemistry of the Russian Academy of  
Sciences, 31 Leninsky Prosp., 119991, Moscow, Russia

Table S1. Physicochemical characteristics of melting process of the objects of investigation

| Compound       | $M_r$ ,<br>g mol <sup>-1</sup> | Phase transition temperatures, °C                                                                              |
|----------------|--------------------------------|----------------------------------------------------------------------------------------------------------------|
| Nalidixic acid | 232.24                         | 227.7 ± 0.5 (fusion) <sup>1</sup>                                                                              |
| Oxolinic acid  | 261.23                         | 319.0 ± 0.5 (fusion with decomposition) <sup>1</sup>                                                           |
| Norfloxacin    | 319.33                         | 80–117 (dehydration)<br>195.6 (solid-solid transition)<br>220.4 ± 0.2 (fusion with decomposition) <sup>2</sup> |
| Levofloxacin   | 361.37                         | 50–85 (desolvation)<br>232.9 ± 0.2 (fusion) <sup>2</sup>                                                       |
| Enrofloxacin   | 359.40                         | 221.6 ± 0.2 (fusion with decomposition) <sup>2</sup>                                                           |
| Tyramine       | 137.18                         | 160-162 (fusion) <sup>3</sup>                                                                                  |

1. A. N. Manin, A. P. Voronin, K. V. Drozd and G. L. Perlovich, *Thermochim. Acta*, 2019, 682, 178411

2. S. Blokhina, A. Sharapova, M. Ol'khovich and G. Perlovich, *J. Chem. Thermodyn.*, 2017, 105, 37–43

3. S. Mittapalli, M. K. Chaitanya Mannava, R. Sahoo and A. Nangia, *Cryst. Growth Des.*, 2019, 19, 219–230

Table S2. Crystallographic data for the [LFX+TYA] (1:1) Form I

|                       |                                         |
|-----------------------|-----------------------------------------|
| Chemical formula      | $C_{18}H_{28}FN_3O_4 \cdot C_8H_{12}NO$ |
| Formula weight        | 507.62                                  |
| Crystal system        | triclinic                               |
| Space group           | <i>P</i> -1                             |
| Temperature/K         | 298                                     |
| <i>a</i> /Å           | 10.5239 (2)                             |
| <i>b</i> /Å           | 11.7151 (2)                             |
| <i>c</i> /Å           | 12.0893(2)                              |
| $\alpha$ /°           | 112.2334 (6)                            |
| $\beta$ /°            | 110.0538 (7)                            |
| $\gamma$ /°           | 99.0756 (7)                             |
| Volume/Å <sup>3</sup> | 1223.12                                 |

Table S3. Hydrogen bond geometry in the quinolone multicomponent crystals

| Multicomponent crystal             | Interaction                 | D...A/Å | H...A/Å | ∠D-H...A/° |
|------------------------------------|-----------------------------|---------|---------|------------|
| [NFX+TYA+MeOH] (1:1:1)             | O21-H21... O2               | 2.62    | 1.59    | 165.5      |
|                                    | N21 <sup>+</sup> -H27... N3 | 2.87    | 1.90    | 170.3      |
|                                    | N21 <sup>+</sup> -H29...O1  | 2.82    | 2.00    | 139.9      |
|                                    | N21 <sup>+</sup> -H29...O3  | 2.80    | 2.07    | 130.8      |
|                                    | N21 <sup>+</sup> -H28...O2  | 3.71    | 2.95    | 138.3      |
|                                    | N21 <sup>+</sup> -H28...O3  | 2.85    | 1.94    | 160.5      |
|                                    | N3-H31...O21                | 3.14    | 2.24    | 158.9      |
|                                    | O18-H18...O2                | 2.73    | 1.88    | 179.7      |
| [EFX+TYA+H <sub>2</sub> O] (1:1:1) | O4-H4...O2                  | 2.63    | 1.78    | 179.5      |
|                                    | N4 <sup>+</sup> -H42...O2   | 3.54    | 2.80    | 137.9      |
|                                    | N4 <sup>+</sup> -H42...O3   | 2.81    | 1.91    | 165.3      |
|                                    | N4 <sup>+</sup> -H43...O1   | 2.79    | 2.12    | 125.3      |
|                                    | N4 <sup>+</sup> -H43...O3   | 2.81    | 1.98    | 144.1      |
|                                    | O5-H51...N3                 | 2.93    | 1.97    | 169.7      |
|                                    | N4 <sup>+</sup> -H41...O5   | 2.95    | 2.06    | 160.5      |
|                                    | O5-H52...O4                 | 3.11    | 2.26    | 151.1      |

Table S4. Liquid-assisted grinding with different solvents experiment results

| System             | Solvent                               |                                                 |                                       |
|--------------------|---------------------------------------|-------------------------------------------------|---------------------------------------|
|                    | EtOH                                  | MeOH                                            | H <sub>2</sub> O                      |
| (NLD+TYA)<br>(1:1) | [NLD+TYA] (1:1)                       | [NLD+TYA] (1:1)                                 | [NLD+TYA] (1:1)                       |
| (OXL+TYA)<br>(1:1) | OXL; TYA                              | OXL; TYA                                        | OXL; TYA                              |
| (NFX+TYA)<br>(1:1) | [NFX+TYA] (1:1)                       | [NFX+TYA+MeOH]<br>(1:1:1)                       | [NFX+TYA+H <sub>2</sub> O]<br>(1:1:3) |
| (LFX+TYA)<br>(1:1) | [LFX+TYA] (1:1)<br>Form I             | [LFX+TYA+MeOH]<br>(1:1:1)                       | [LFX+TYA] (1:1)<br>Form I             |
| (EFX+TYA)<br>(1:1) | [EFX+TYA+H <sub>2</sub> O]<br>(1:1:1) | [EFX+TYA+H <sub>2</sub> O] (1:1:1);<br>EFX; TYA | [EFX+TYA+H <sub>2</sub> O]<br>(1:1:1) |

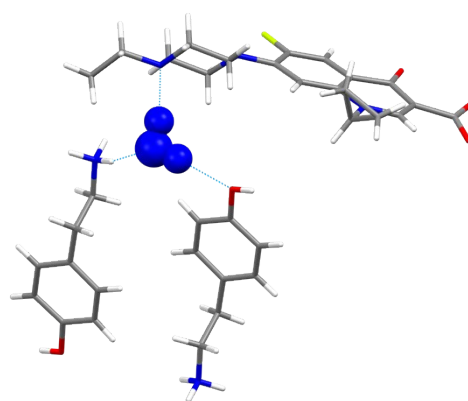

Fig. S1. Intermolecular interactions between H<sub>2</sub>O molecules, EFX and TYA in [EFX+TYA+H<sub>2</sub>O] (1:1:1).

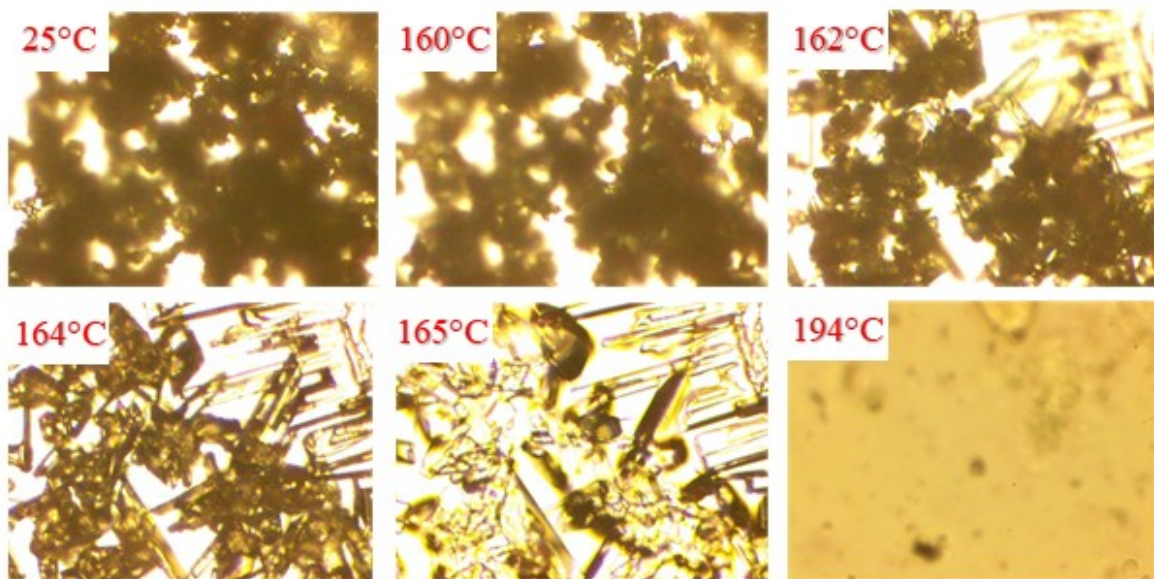

Fig. S2. HSM images of the (NFX+TYA) physical mixture (1:1) taken at various temperatures during the sample heating.

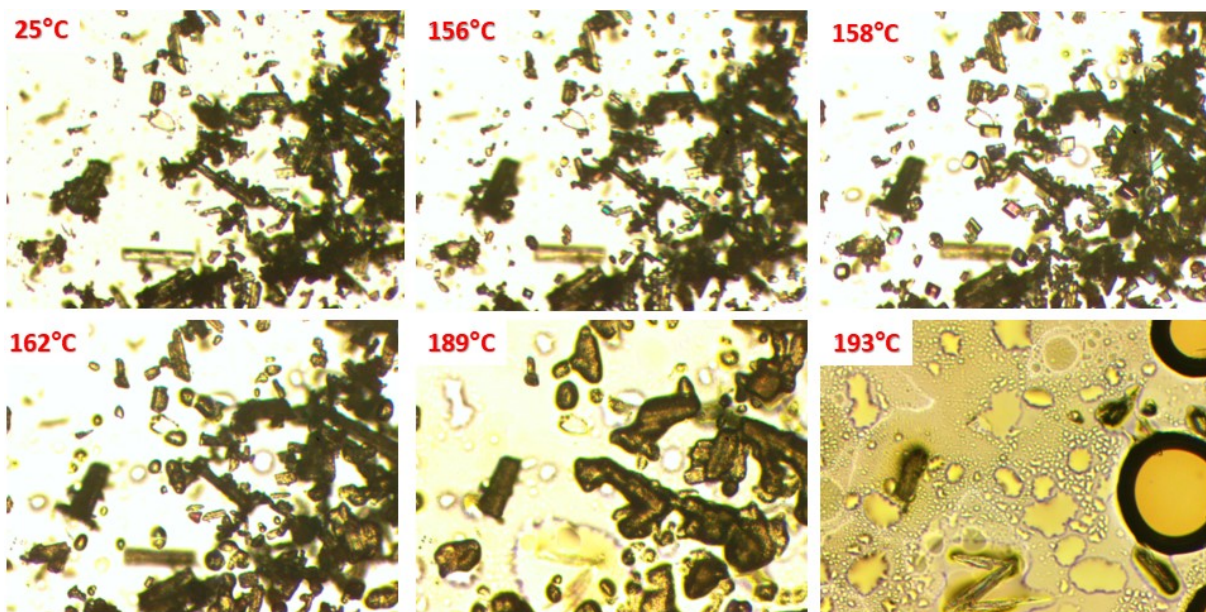

Fig. S3. HSM images of the (LFX+TYA) physical mixture (1:1) taken at various temperatures during the sample heating.



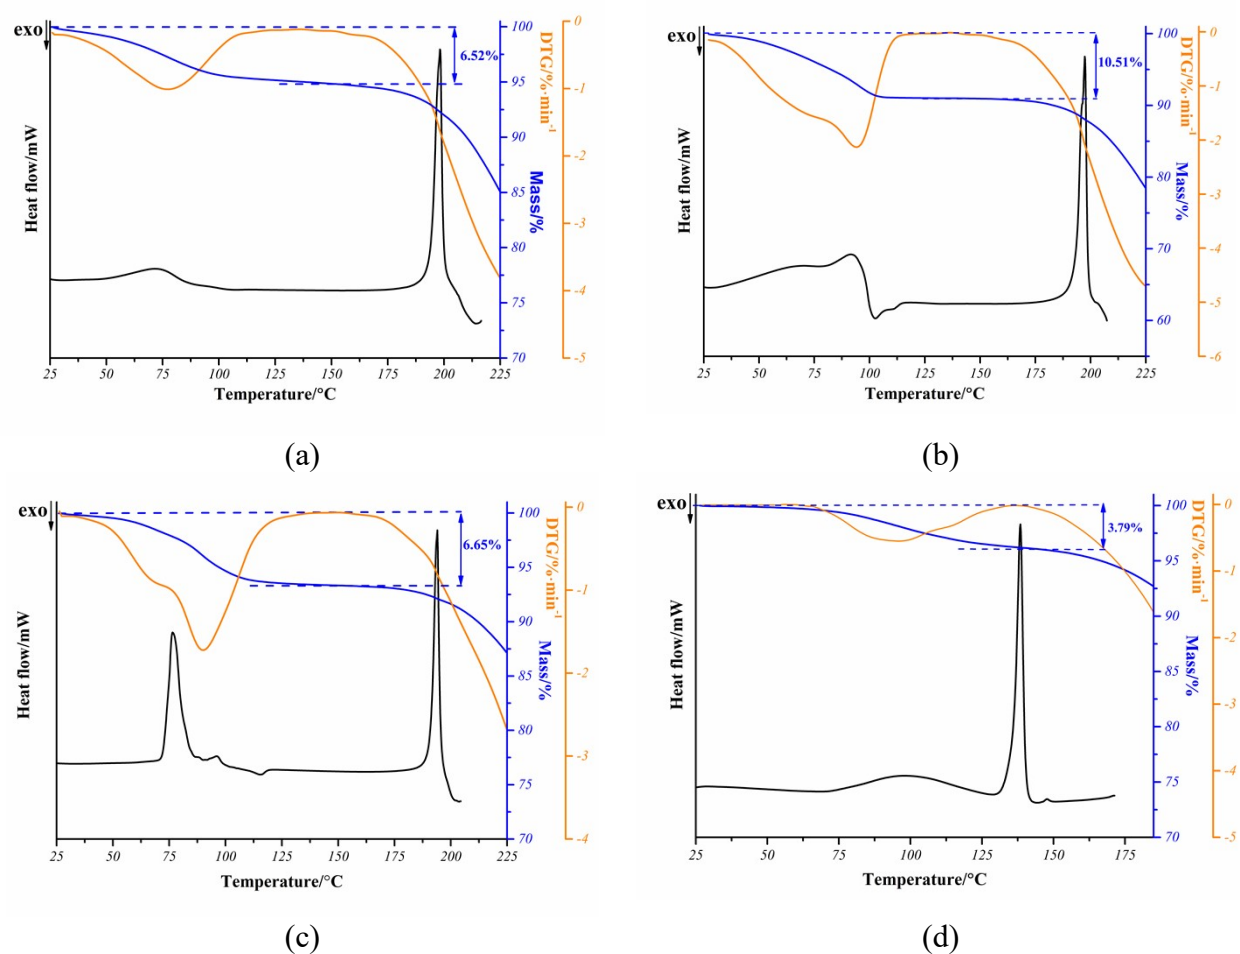

Fig. S4. DSC/TG/DTG curves for: (a) [NFX+TYA+MeOH] (1:1:1); (b) [NFX+TYA+H<sub>2</sub>O] (1:1:3); (c) [LFX+TYA+MeOH] (1:1:1) and (d) [EFX+TYA+H<sub>2</sub>O] (1:1:1). Expected calculated mass loss for (a) 6.55%; (b) 10.58%; (c) 6.03%; (d) 3.50%

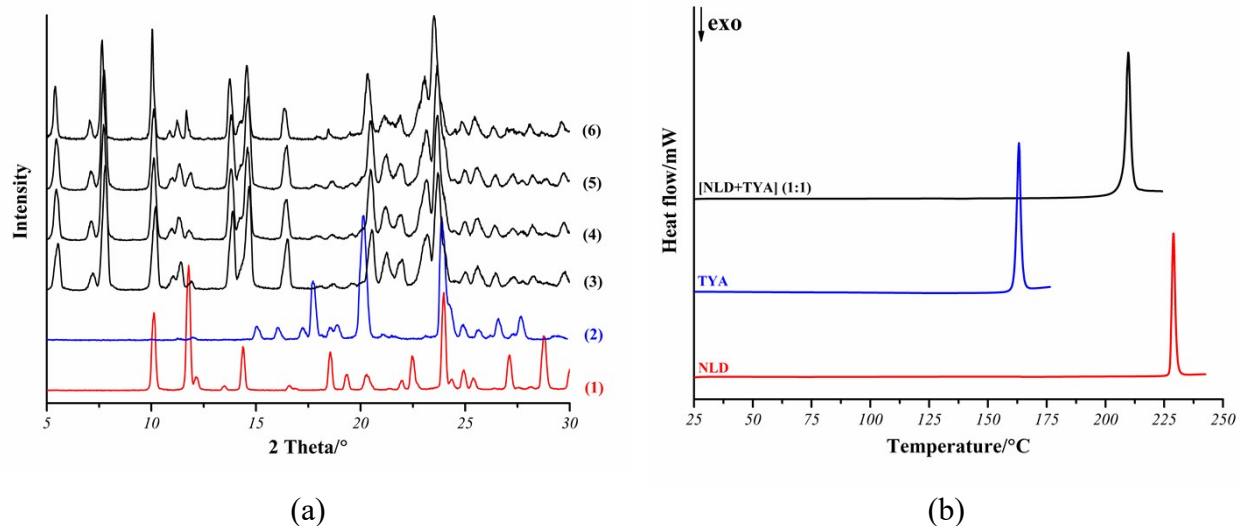

Fig. S5. (a) Experimental PXRD patterns and (b) DSC curves for mixtures after LAG with different solvents ((1) NLD, (2) TYA, (3) LAG of physical mixture in the presence of EtOH, (4) LAG of physical mixture in the presence of MeOH, (5) LAG of physical mixture in the presence of H<sub>2</sub>O, (6) physical mixture (NLD+TYA) (1:1) after heating).

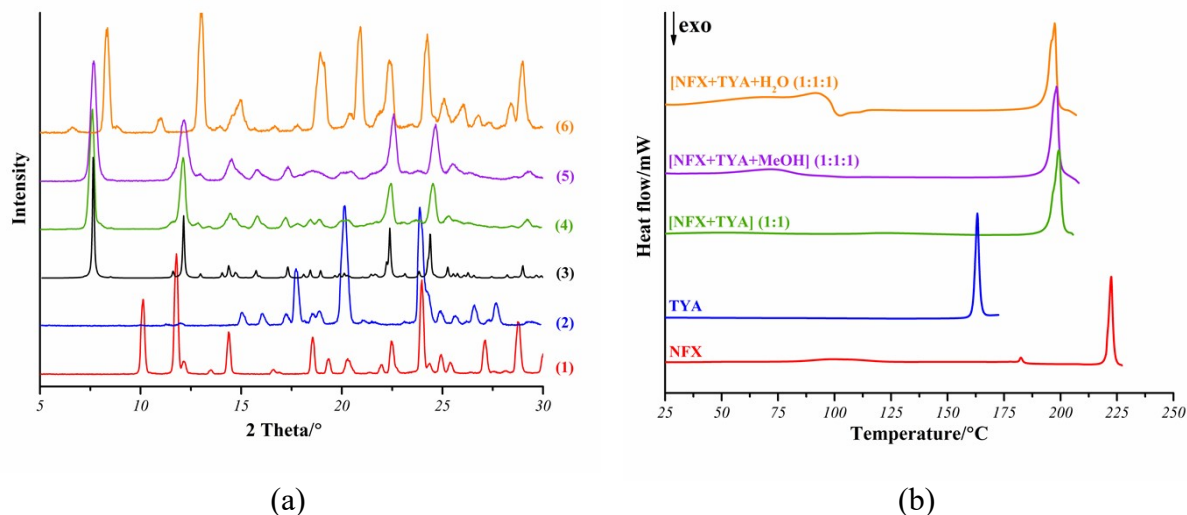

Fig. S6. Comparisons of (a) PXRD patterns and (b) DSC curves for multicomponent crystals with NFX and TYA ((1) NFX, (2) TYA, (3) [NFX+TYA+MeOH] salt (1:1:1), (4) LAG of physical mixture in the presence of EtOH, (5) LAG of physical mixture in the presence of MeOH, (6) LAG of physical mixture in the presence of H<sub>2</sub>O).

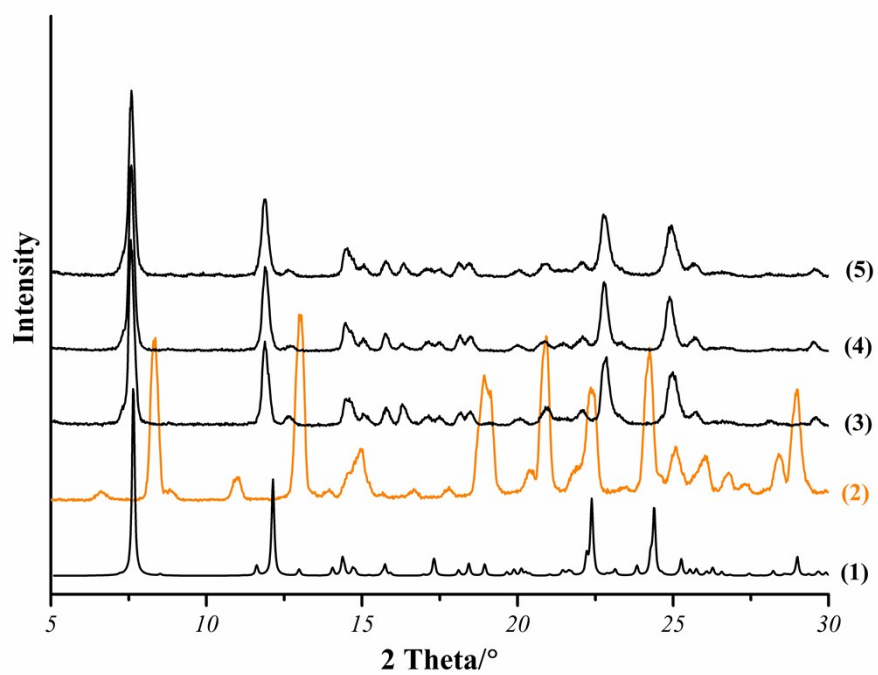

Fig. S7. PXRD patterns for (NFX+TYA) systems (1:1), obtained by thermal methods: (1) [NFX+TYA] (1:1), (2) [NFX+TYA+H<sub>2</sub>O] (1:1:3), (3) physical mixture (NFX+TYA) after heating, (4) [NFX+TYA+MeOH] (1:1:1) after heating to 120 °C, (5) [NFX+TYA+H<sub>2</sub>O] (1:1:3) after heating to 130°C.

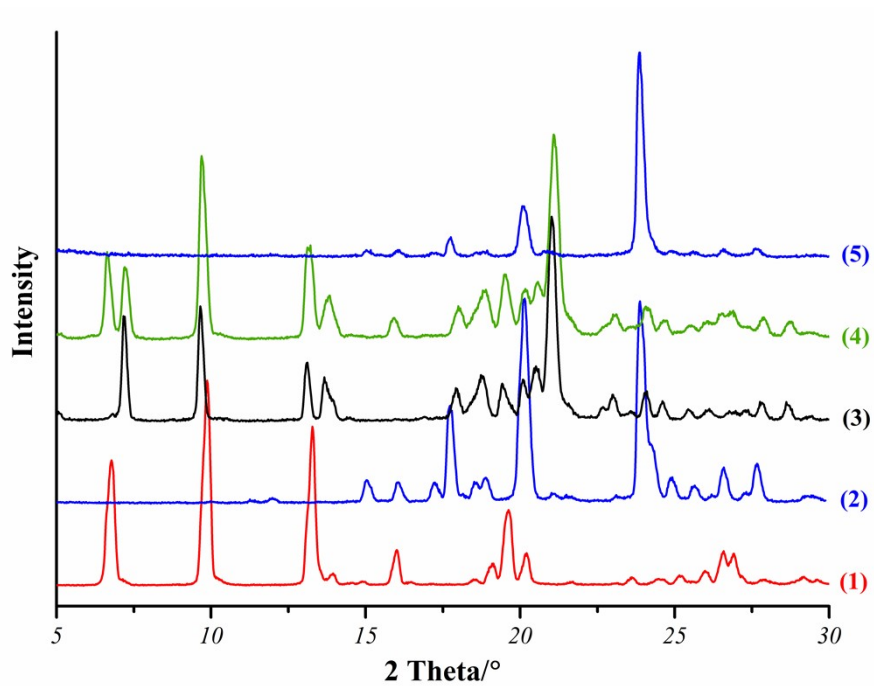

Fig. S8. PXR D patterns of the samples, obtained by (LFX+TYA) (1:1) cosublimation: (1) LFX, (2) TYA, (3) [LFX+TYA] (1:1) Form II, (4) residue phase, (5) sublimate phase.

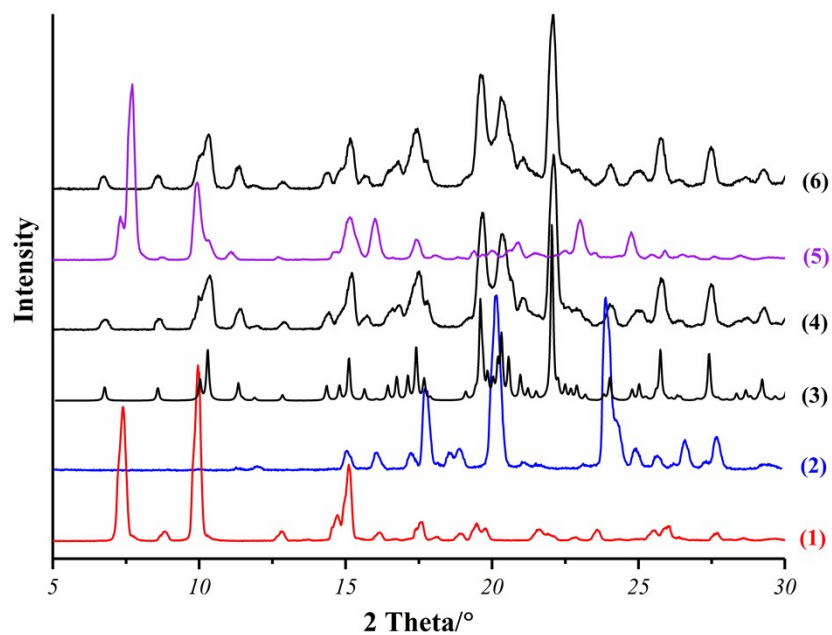

Fig. S9. PXRD patterns of the (EFX+TYA) (1:1) mixtures after liquid-assisted grinding ((1) EFX, (2) TYA, (3) [EFX+TYA+H<sub>2</sub>O] (1:1:1), (4) LAG of physical mixture in the presence of EtOH, (5) LAG of physical mixture in the presence of MeOH, (6) LAG of physical mixture in the presence of H<sub>2</sub>O).

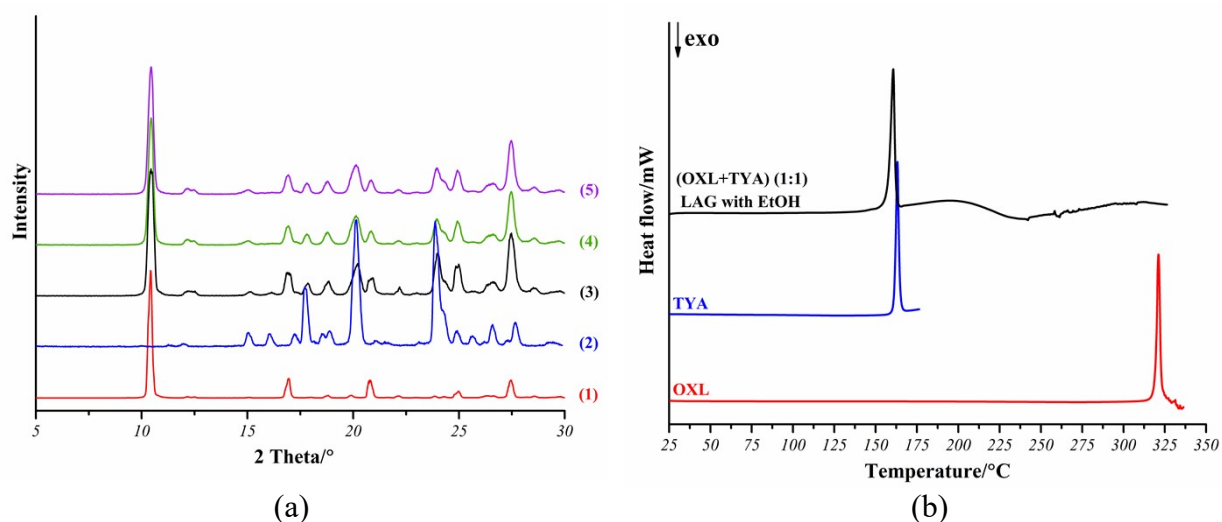

Fig. S10. (a) PXRD patterns and (b) DSC curves of the (OXL+TYA) (1:1) mixtures, obtained by LAG with different solvents: (1) OXL, (2) TYA, (3) LAG of physical mixture in the presence of EtOH, (4) LAG of physical mixture in the presence of MeOH, (5) LAG of physical mixture in the presence of H<sub>2</sub>O.
